# Supplementary material for: Biphasic water–oil systems for functional augmentation of probiotic Lactobacillus acidophilus nanoencapsulated in luteolin-Fe3+ shells
Source: Royal Society of Chemistry journal article supplement (doi:10.1039/d4cc01603c), 2024-01-01
Supplement: d4cc01603c1.pdf [file d4cc01603c1.pdf]

## Electronic Supplementary Information

### Biphasic Water-Oil Systems for Functional Augmentation of Probiotic *Lactobacillus acidophilus* Nanoencapsulated in Luteolin-Fe<sup>3+</sup> Shells

Duc Tai Nguyen,<sup>1</sup> Sang Yeong Han,<sup>1</sup> Filip Kozłowski,<sup>2</sup> Gulaim A. Seisenbaeva,<sup>2</sup> Vadim G. Kessler,<sup>2</sup> Beom Jin Kim,<sup>3</sup> and Insung S. Choi<sup>1,\*</sup>

<sup>1</sup> Center for Cell-Encapsulation Research, Department of Chemistry, KAIST, Daejeon 34141, Korea

<sup>2</sup> Department of Molecular Sciences, Swedish University of Agricultural Sciences, P.O. Box 7015, 75007 Uppsala, Sweden

<sup>3</sup> Department of Chemistry, University of Ulsan, Ulsan 44776, Korea

#### Table of Contents

- Experimental.
- **Figure S1.** Optical images of the biphasic system before and after vortex.
- **Figure S2.** Young's moduli of *L. acidophilus* and *L.acidophilus*@LUT-Fe<sup>3+</sup>.
- **Figure S3.** AFM image, FT-IR, XPS, and UV-vis absorbance spectra of hollow LUT-Fe<sup>3+</sup> capsules.
- **Figure S4.** FE-SEM images of various *L.acidophilus*@flavonoid-Fe<sup>3+</sup>.
- **Figure S5.** FE-SEM images, EDX mapping, CLSM images and viability test of *S.cerevisiae*@LUT-Fe<sup>3+</sup>.
- **Figure S6.** Viability at pH 2 and long-term viability of naïve and SCNEd *L. acidophilus*.
- **Figure S7.** Optical images of the *L.acidophilus*@LUT-Fe<sup>3+</sup> suspension and FE-SEM images of *L.acidophilus*@LUT-Fe<sup>3+</sup> before and after incubation in GSH.
- **Figure S8.** ABTS assay of the supernatant collected from the cell suspension after incubation with H<sub>2</sub>O<sub>2</sub>.

## Experimental

**Materials.** Luteolin (LUT, 98%, TCI), quercetin (QUE, 95%, Sigma-Aldrich), naringenin (NAR, 93%, TCI), myricetin (MYR, 97%, TCI), iron(III) chloride hexahydrate ( $\text{FeCl}_3 \cdot 6\text{H}_2\text{O}$ ,  $\geq 98.0\%$ , Sigma-Aldrich), sunflower seed oil (100% extract, Haepyo), Alexa Fluor 488-conjugated albumin from bovine serum (BSA-Alexa 488, Invitrogen), polyoxyethylene (20) sorbitan monooleate (Tween 80, TCI), polystyrene microparticle (PS, diameter: 3.97  $\mu\text{m}$ , Microparticles GmbH), tetrahydrofuran (THF, HPLC grade, Junsei), 2,2'-Azino-bis(3-ethylbenzothiazoline-6-sulfonic acid) diammonium salt (ABTS, 98%, Sigma-Aldrich), peroxidase from horseradish (HRP, 250 U/mg, Sigma-Aldrich), hydrogen peroxide ( $\text{H}_2\text{O}_2$ , 35.5%, Samchun), L-glutathione reduced (GSH, 98%, Sigma-Aldrich),  $\alpha$ -amylase from porcine pancreas (10-11 U/mg, Sigma-Aldrich), hydrochloric acid (HCl, 37%, Daejung), lysozyme from hen egg white ( $>23000$  U/mg, Roche), 2,2-diphenyl-1-picrylhydrazyl (DPPH, Sigma-Aldrich), propidium iodide (PI, Sigma-Aldrich), SYTO<sup>TM</sup> 9 green fluorescent nucleic acid stain (SYTO 9, Thermo Fisher Scientific), fluorescein diacetate (FDA, Sigma-Aldrich), *Lactobacillus acidophilus* (*L. acidophilus* ATCC 4356 from the American Type Culture Collection (ATCC)), *Lactobacilli* MRS broth (BD), *Lactobacilli* MRS agar (BD), *Saccharomyces cerevisiae* (*S. cerevisiae* ATCC 18824 from the Korean Collection for Type Cultures (KCTC)), yeast-extract-peptone-dextrose (YPD) broth (Duchefa Biochemistry), YPD agar (Duchefa Biochemistry), L-ascorbic acid (99%, Sigma-Aldrich), BD GasPak<sup>TM</sup> EZ anaerobic gas generating pouch systems (BD GasPak<sup>TM</sup> supplies), dimethyl sulfoxide (DMSO, 99.9%, Sigma-Aldrich), ethanol (absolute, Supelco), potato starch covalently linked with Remazol Brilliant Blue R (Starch Azure, Sigma-Aldrich), acetone (99.5%, Samchun Chemicals), phosphate-buffered saline (PBS, pH 7.4, Welgene), and acetic acid (99.7%, Sigma-Aldrich) were used as received. Deionized (DI) water (18.3 M $\Omega$ -cm) from Milli-Q Direct 8 (Millipore) was used.

**Single-Cell Nanoencapsulation (SCNE).** A single colony of *L. acidophilus*, picked from an MRS agar plate, was cultured for 24 h in the MRS broth medium at 33 °C prior to SCNE. To 5 mL of an aqueous suspension of *L. acidophilus* ( $\text{OD}_{600} = 0.5$ ) with  $\text{FeCl}_3$  (0.5 mM) was added 5 mL of a sunflower oil solution of LUT (0.5 mM). The mixture was stirred for 60 min at 700 rpm at room temperature, transferred to a microtube, and centrifuged at 6000 g for 1 min to collect *L.acidophilus*@LUT- $\text{Fe}^{3+}$ . The SCNEd cells were washed with an aqueous solution of Tween 80 (1 mg/mL) at least 3 times to remove oil residuals, and washed with DI water. For SCNE of *S. cerevisiae*, a single colony of *S. cerevisiae*, picked from an YPD agar plate, was cultured for 30 h in the YPD broth medium at 33 °C before SCNE. For the formation of hollow capsules, PS particles were coated using the same protocol as for *L. acidophilus*. For the removal of the PS core, the PS@LUT- $\text{Fe}^{3+}$  in THF (1 mL) was vortexed for 1 min and centrifuged at 2000 g for 1 min, and the supernatant was removed. After repeating the process three times, THF was added, and the suspension was incubated for 3 h for PS removal.

**Viability.** To an aqueous suspension of naïve or *L.acidophilus*@LUT- $\text{Fe}^{3+}$  (1 mL) were added 2  $\mu\text{L}$  of the SYTO 9 stock solution (3.34 mM in DMSO) and 2  $\mu\text{L}$  of the PI stock solution (20 mM in DMSO). The resultant was incubated for 20 min at 33 °C, and viability was assessed, after washing with DI water, by confocal laser-scanning microscopy (CLSM). For viability assay of *S. cerevisiae*, FDA (10 mg/mL in acetone) was used instead of SYTO 9. For the measurement of colony-forming units (CFUs), *L.acidophilus*@LUT- $\text{Fe}^{3+}$  were incubated in an aqueous solution

of L-ascorbic acid (20 mM) for 15 min for shell degradation. The cell suspension ( $OD_{600} = 1$ ) was 10-fold serially diluted (from  $10^0$  to  $10^{-5}$ ) in DI water, and 100  $\mu$ L of the final diluted suspension ( $10^{-5}$ ) was spread on an MRS agar plate and cultured for 24 h at 33 °C. For long-term viability measurement, the cell suspension in DI water were put in a sealed tube, placed in an anaerobic pouching system, and keep at 4 °C until the SYTO 9/PI viability test at predetermined time point.

**Functional Augmentation.** (a) *Lysozyme*: To 100  $\mu$ L of *L.acidophilus@LUT-Fe<sup>3+</sup>* or naïve cells ( $OD_{600} = 1$ ) was added 900  $\mu$ L of a lysozyme solution (1 mg/mL in PBS, pH 7.4). The mixture was incubated at 37 °C in an incubator, and  $OD_{600}$  of the mixture was measured, with 100  $\mu$ L of an aliquot, at the predetermined time points. (b) *DPPH*: To 1100  $\mu$ L of ethanol were sequentially added 100  $\mu$ L of *L.acidophilus@LUT-Fe<sup>3+</sup>* or naïve cells ( $OD_{600} = 1$ ) and 300  $\mu$ L of a DPPH solution (600  $\mu$ M in ethanol), and the UV absorbance was measured at 517 nm at the predetermined time points, after taking 100  $\mu$ L of the supernatant. (c) *H<sub>2</sub>O<sub>2</sub>*: The naïve cells or *L.acidophilus@LUT-Fe<sup>3+</sup>* ( $OD_{600} = 1$  each) were incubated in DI solution of H<sub>2</sub>O<sub>2</sub> (30 mM) for 10 min. After that, the supernatant was subjected to an ABTS (1 mM)/HRP(0.75 U/mL) assay to record the ABTS<sup>++</sup> absorbance at 414 nm. (d)  *$\alpha$ -Amylase*: To 100  $\mu$ L of a sample (*L.acidophilus@LUT-Fe<sup>3+</sup>*, naïve *L. acidophilus*, free LUT, or free QUE) was added 200  $\mu$ L of aqueous  $\alpha$ -amylase solution (2 mg/mL). After 15 min of incubation at 37 °C for 15 min, 200  $\mu$ L of a Starch Azure suspension (pre-heated at 37 °C, 20 mg/mL) was immediately added to the mixture, and the resulting mixture was incubated at 37 °C. After 1 h of reaction, 100  $\mu$ L of acetic acid (3 M) was added to the mixture to terminate the reaction, followed by filtering with membrane filters (pore size: 0.2  $\mu$ m) to collect the supernatants. The UV-vis absorbance was measured at 595 nm, and the inhibition percentage was calculated by %Inhibition = 100 – (absorbance of a sample)/(absorbance of the control)  $\times$  100. In the case of the control, DI water was used in replacement of *L. acidophilus* suspension in the reaction mixture.

**Characterizations.** Field-emission scanning electron microscopy (FE-SEM) imaging was performed with an FEI Inspect F50 microscope (FEI) with an accelerating voltage of 5 kV, after sputter-coating with platinum. Transmission electron microscopy (TEM) imaging and energy-dispersive X-ray (EDX) spectroscopy elemental analysis were conducted with a Talos F200X (FEI) with a carbon-support-film copper mesh. Atomic force microscopy (AFM) images were taken in the QI mode with a NanoWizard4 BioAFM (JPK), and Young's modulus was calculated using the Hertz/Sneddon model (tip: HQ-NSC15/AI BS, MikroMasch). The  $\zeta$ -potential was measured with a Zetasizer Nano ZS (Malvern). CLSM imaging was performed with an LSM 700 (Carl Zeiss), and UV-Vis absorbance was measured with a SpectraMax iD5 microplate reader (Molecular Devices) in a 96-well plate.

**Statistical Analysis.** Multiple independent samples ( $n = 3$  to 11) were prepared, with one measurement conducted for each sample, except for the measurement of Young's moduli. For Young's moduli, two independent samples were prepared, with 6 measurements taken from individual bacteria in each sample ( $n = 12$ ). Data are presented as mean  $\pm$  SE and represented as white circles to denote the measured value from each independent experiment. Statistical significance was determined using an unpaired, two-sided Student's *t*-test ( $n = 10$ ). IBM SPSS Statistics 26 and Origin 2019 were used to perform data analysis and graph generation.

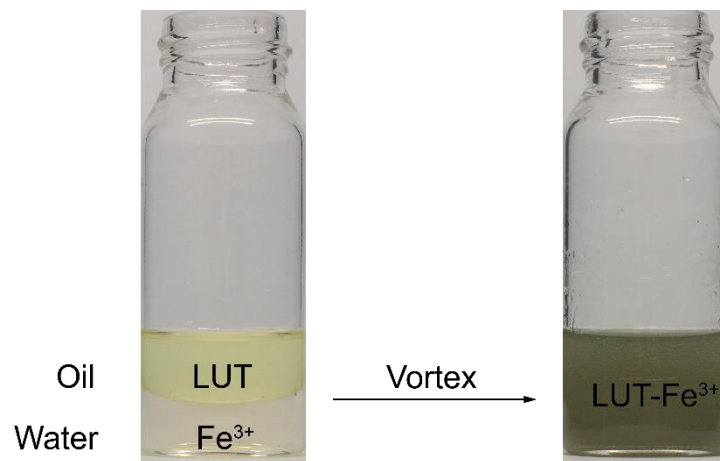

**Figure S1.** Optical images of the reaction mixture before and after vortex.

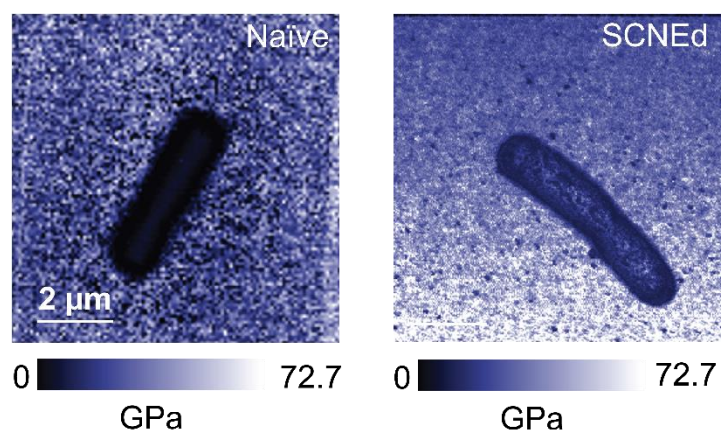

**Figure S2.** Young's moduli of naïve and SCNEd *L. acidophilus*.

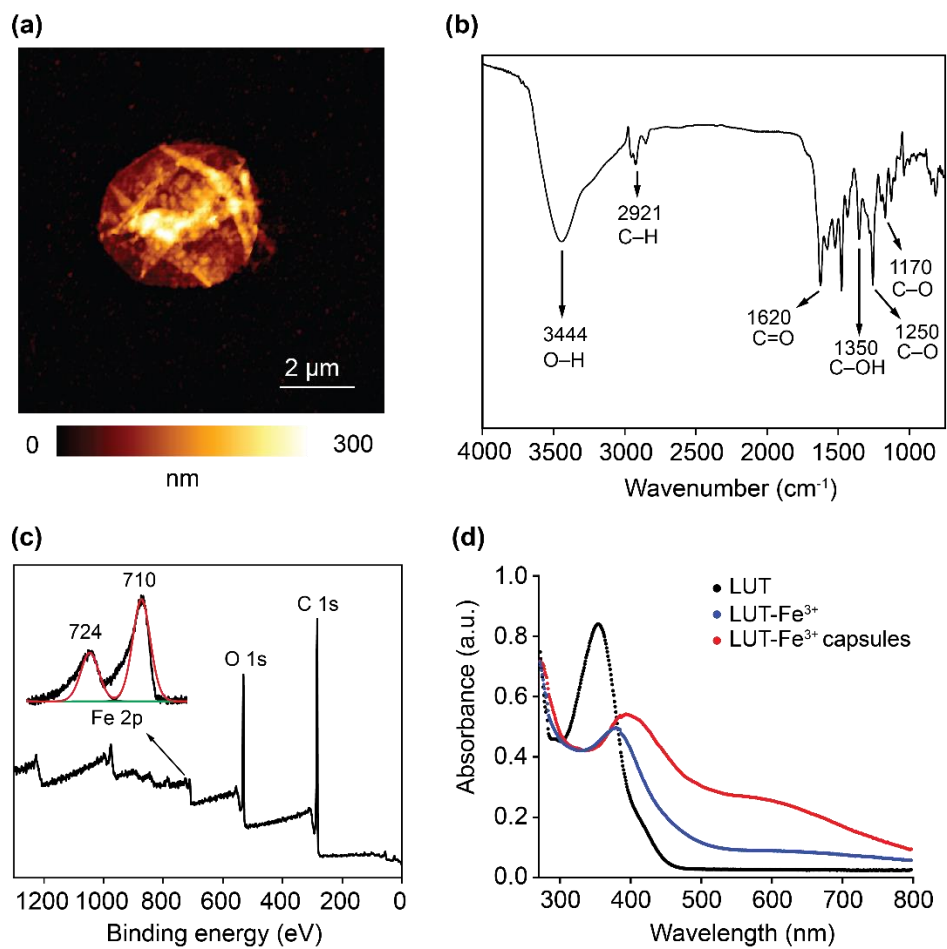

**Figure S3.** (a) AFM image of hollow LUT-Fe<sup>3+</sup> capsules. (b-d) (b) FT-IR, (c) XPS, and (d) UV-vis absorbance spectra of hollow LUT-Fe<sup>3+</sup> capsules.

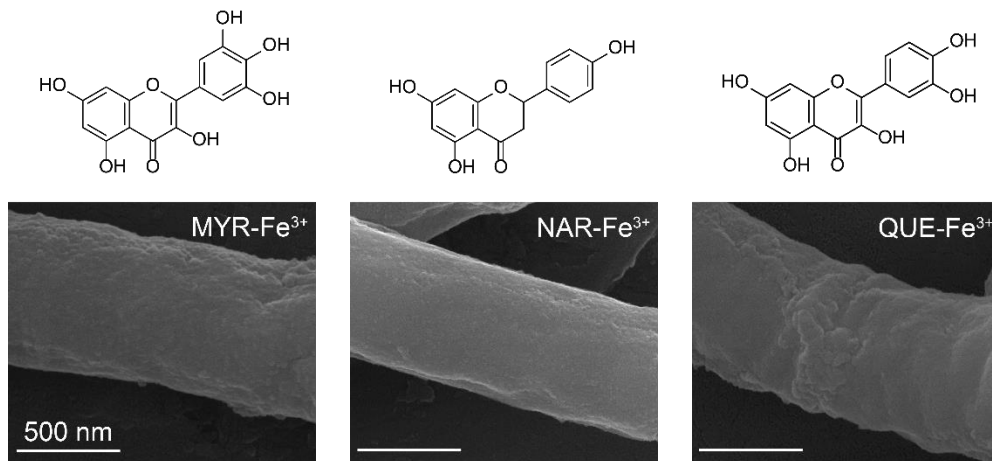

**Figure S4.** FE-SEM images of *L.acidophilus*@flavonoid-Fe<sup>3+</sup>.

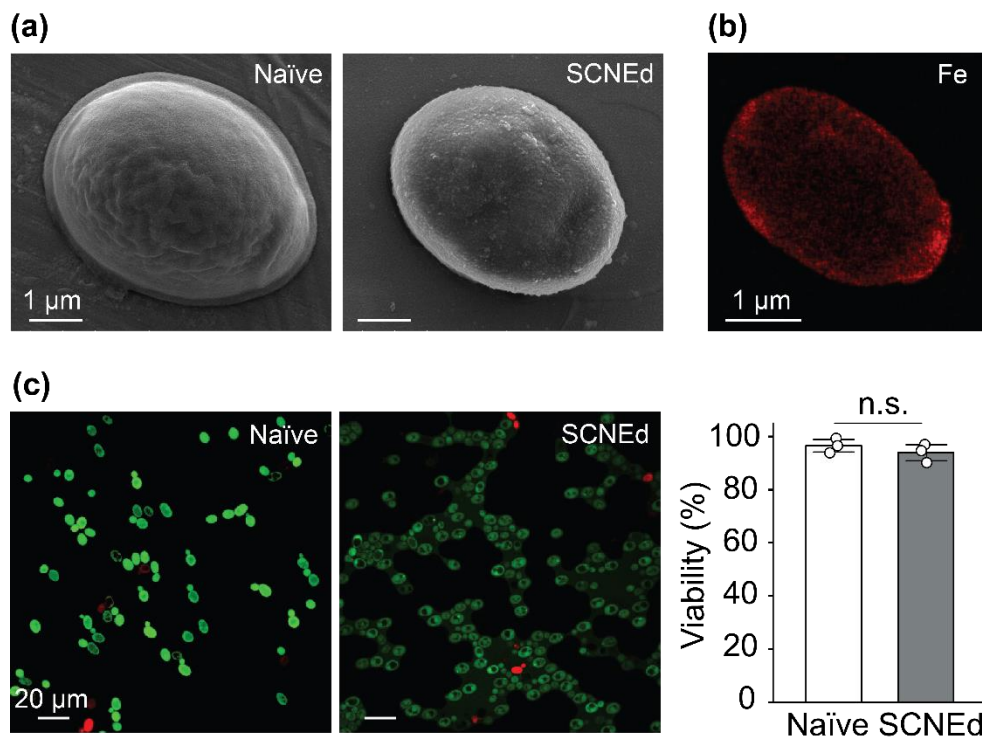

**Figure S5.** (a) FE-SEM images of naïve and SCNEd *S. cerevisiae*. (b) TEM-EDX Fe mapping of *S. cerevisiae*@LUT-Fe<sup>3+</sup>. (c) Live/dead assay: CLSM images and viability of *S. cerevisiae* before and after SCNE. FDA (green): live and PI (red): dead. Data are represented as mean  $\pm$  SE (unpaired, two-sided Student's *t*-test; *n* = 3; n.s.: not significant).

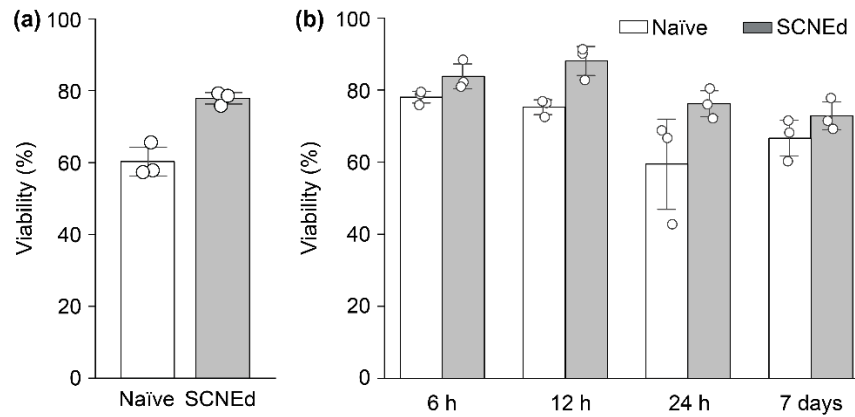

**Figure S6.** (a) Viability of naïve and SCNEd *L. acidophilus* at pH 2. (b) Long-term viability of naïve and SCNEd *L. acidophilus*.

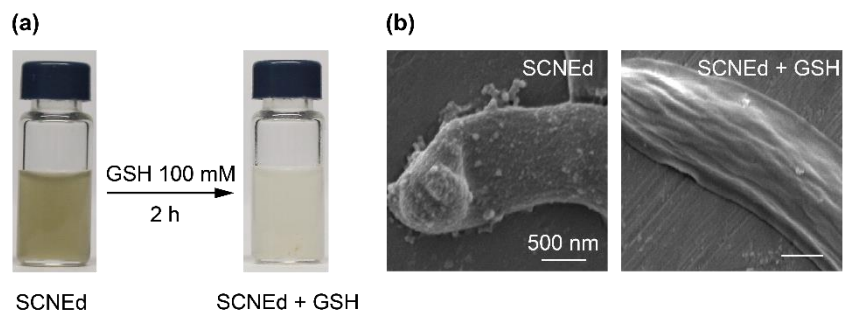

**Figure S7.** (a) Optical images of the *L. acidophilus*@LUT-Fe<sup>3+</sup> suspension before and after incubation in 100-mM GSH. (b) FE-SEM images of *L. acidophilus*@LUT-Fe<sup>3+</sup> before and after incubation in 100-mM GSH.

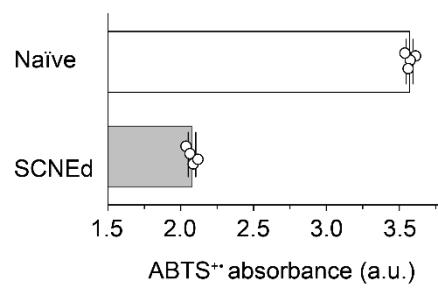

**Figure S8.** ABTS assay of the supernatant collected from the cell suspension after incubation with H<sub>2</sub>O<sub>2</sub>.
